# Supplementary material for: Altered Sex Ratio at Birth with Maternal Exposure to Dioxins in Vietnamese Infants
Source: MDPI journal article supplement (doi:10.3390/toxics12040276), 2024-04-09
Supplement: s1 [file s1]

Supple. Table 1 Skewness and Kurtosis of dioxin markers of paternal and maternal exposure (37 pairs)

|                                    | Paternal exposure (lognormal transformed data) |      |      |      |          |          | Maternal exposure (lognormal transformed data) |      |       |      |          |          |
|------------------------------------|------------------------------------------------|------|------|------|----------|----------|------------------------------------------------|------|-------|------|----------|----------|
|                                    | Min.                                           | Max. | Mean | SD   | Skewness | Kurtosis | Min.                                           | Max. | Mean  | SD   | Skewness | Kurtosis |
| <i>PCDD congeners (pg/g lipid)</i> |                                                |      |      |      |          |          |                                                |      |       |      |          |          |
| 2,3,7,8-TCDD                       | 0.18                                           | 2.57 | 0.89 | 0.43 | 1.70     | 5.49     | -0.25                                          | 1.65 | 0.32  | 0.37 | 1.31     | 3.34     |
| 1,2,3,7,8-PeCDD                    | 0.64                                           | 1.35 | 1.02 | 0.17 | -0.18    | -0.58    | -0.06                                          | 0.69 | 0.40  | 0.16 | -0.64    | 0.81     |
| 1,2,3,4,7,8-HxCDD                  | 0.43                                           | 1.07 | 0.77 | 0.16 | -0.29    | -0.41    | -0.29                                          | 0.49 | 0.11  | 0.20 | 0.06     | -0.24    |
| 1,2,3,6,7,8-HxCDD                  | 0.74                                           | 1.57 | 1.12 | 0.18 | -0.02    | 0.37     | 0.24                                           | 1.08 | 0.54  | 0.20 | 0.64     | 0.07     |
| 1,2,3,7,8,9-HxCDD                  | 0.43                                           | 1.50 | 0.83 | 0.22 | 0.60     | 1.47     | -0.20                                          | 0.64 | 0.15  | 0.21 | 0.22     | -0.35    |
| 1,2,3,4,6,7,8-HeptaCDD             | 0.97                                           | 2.47 | 1.52 | 0.28 | 0.89     | 2.93     | 0.37                                           | 1.35 | 0.86  | 0.22 | -0.09    | -0.37    |
| OCDD                               | 2.53                                           | 3.42 | 2.98 | 0.23 | 0.15     | -0.75    | 1.04                                           | 2.26 | 1.78  | 0.26 | -0.38    | 0.46     |
| <i>PCDF congeners (pg/g lipid)</i> |                                                |      |      |      |          |          |                                                |      |       |      |          |          |
| 2,3,7,8-TCDF                       | 0.17                                           | 1.00 | 0.63 | 0.20 | -0.33    | -0.31    | -0.70                                          | 0.22 | -0.20 | 0.24 | 0.03     | -0.64    |
| 1,2,3,7,8-PeCDF                    | 0.12                                           | 1.01 | 0.67 | 0.22 | -0.76    | 0.11     | -0.71                                          | 0.31 | -0.15 | 0.24 | -0.14    | -0.45    |
| 2,3,4,7,8-PeCDF                    | 0.82                                           | 1.34 | 1.13 | 0.13 | -0.13    | -0.44    | 0.12                                           | 0.96 | 0.46  | 0.16 | 1.05     | 2.29     |
| 1,2,3,4,7,8-HxCDF                  | 0.86                                           | 1.48 | 1.18 | 0.16 | -0.18    | -0.23    | 0.21                                           | 1.30 | 0.69  | 0.21 | 0.73     | 2.03     |
| 1,2,3,6,7,8-HxCDF                  | 0.46                                           | 1.28 | 1.02 | 0.17 | -1.03    | 1.67     | 0.07                                           | 1.04 | 0.42  | 0.19 | 0.95     | 2.37     |
| 1,2,3,7,8,9-HxCDF                  | -0.03                                          | 1.83 | 0.56 | 0.31 | 1.73     | 7.00     | -0.87                                          | 0.24 | -0.28 | 0.27 | -0.11    | -0.43    |
| 2,3,4,6,7,8-HxCDF                  | 0.10                                           | 0.99 | 0.59 | 0.20 | -0.21    | 0.37     | -0.56                                          | 0.34 | -0.17 | 0.21 | 0.14     | -0.04    |
| 1,2,3,4,6,7,8-HpCDF                | 0.72                                           | 1.70 | 1.14 | 0.19 | 0.17     | 0.86     | -0.08                                          | 0.95 | 0.36  | 0.21 | 0.49     | 1.21     |
| 1,2,3,4,7,8,9-HpCDF                | 0.04                                           | 1.18 | 0.68 | 0.29 | -0.21    | 0.13     | -0.69                                          | 0.26 | -0.26 | 0.27 | 0.26     | -0.75    |
| OCDF                               | 0.35                                           | 1.33 | 1.01 | 0.22 | -1.15    | 1.28     | -0.46                                          | 0.96 | 0.21  | 0.33 | -0.21    | -0.20    |
| <i>TEQs (pg-TEQ/g lipid)</i>       |                                                |      |      |      |          |          |                                                |      |       |      |          |          |
| TEQ-PCDDs                          | 0.96                                           | 2.60 | 1.38 | 0.28 | 2.44     | 9.85     | 0.34                                           | 1.70 | 0.76  | 0.24 | 1.72     | 5.92     |
| TEQ-PCDFs                          | 0.70                                           | 1.15 | 0.93 | 0.11 | -0.18    | -0.52    | 0.01                                           | 0.76 | 0.28  | 0.16 | 1.36     | 3.12     |
| TEQ-PCDD/Fs                        | 1.16                                           | 2.60 | 1.52 | 0.24 | 2.70     | 11.55    | 0.52                                           | 1.75 | 0.89  | 0.21 | 2.06     | 7.30     |

Min.: minimum, Max.: maximum, SD: standard deviation
